# Supplementary material
Source: Springer Nature journal article supplement (https://www.springermedizin.de/resource/supplementary/13014_2012_771_MOESM3_ESM.pdf/9634690)

ROC curves relative to pCR  
(all patients; n=138)

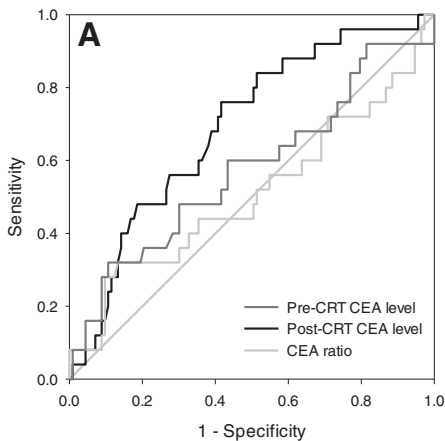

ROC curves relative to pCR  
(patients with pre-CRT CEA <6 ng/ml; n=87)

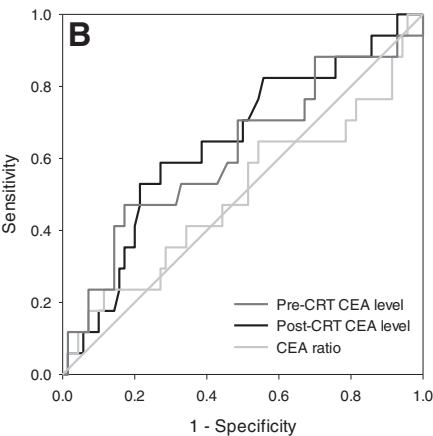

ROC curves relative to pCR  
(patients with pre-CRT CEA  $\geq$ 6 ng/ml; n=51)

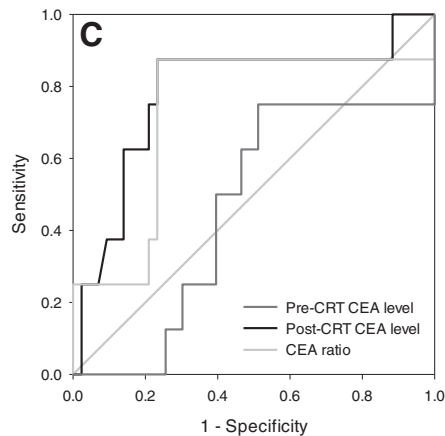

Supplement: MOESM3 [file 9634690]
